# Supplementary material
Source: PubMed Central journal article supplement (PMC7309576)
Supplement: NIHMS1600483-supplement-Supplemental_Table_1.pdf [file NIHMS1600483-supplement-Supplemental_Table_1.pdf]

**Supplemental Table 1.** Characteristics of 413 Cisgender Men who have Sex with Men and Transgender Women Screened for *Mycoplasma genitalium* in Lagos, Nigeria

| <b>Characteristic</b>            | <b>n=413 (%)</b> |
|----------------------------------|------------------|
| <b>Age</b>                       |                  |
| ≤ 21 years                       | 150 (36.3)       |
| 22-30 years                      | 231 (55.9)       |
| >30 years                        | 32 (7.7)         |
| <b>Gender Identity</b>           |                  |
| Cisgender Man                    | 321 (77.7)       |
| Transgender Woman                | 63 (15.3)        |
| Other/Unknown                    | 29 (7.0)         |
| <b>Sexual Orientation</b>        |                  |
| Gay/Homosexual                   | 184 (44.6)       |
| Bisexual                         | 227 (55.0)       |
| Other/Unknown                    | 2 (0.5)          |
| <b>Education Level</b>           |                  |
| Junior Secondary or Less         | 10 (2.4)         |
| Senior Secondary                 | 274 (66.3)       |
| Higher than Senior Secondary     | 129 (31.2)       |
| <b>Occupation</b>                |                  |
| Unemployed                       | 87 (21.1)        |
| Student                          | 115 (27.8)       |
| Professional/Self-Employed       | 63 (15.3)        |
| Entertainment/Hospitality        | 47 (11.4)        |
| Driver/Laborer                   | 15 (3.6)         |
| Other/Unknown                    | 86 (20.8)        |
| <b>Marital Status</b>            |                  |
| Single/Never Married             | 370 (89.6)       |
| Married/Living with a Woman      | 9 (2.2)          |
| Living with a Man                | 20 (4.8)         |
| Divorced/Widowed/Separated/Other | 14 (3.4)         |

Self-reported characteristics of participants who underwent retrospective screening for *Mycoplasma genitalium* are presented with column percentages in parentheses.
