# Supplementary material
Source: PubMed Central journal article supplement (PMC7309576)
Supplement: NIHMS1600483-supplement-Supplemental_Table_2.pdf [file NIHMS1600483-supplement-Supplemental_Table_2.pdf]

**Supplemental Table 2.** Symptoms Reported by Cisgender Men who have Sex with Men and Transgender Women with *Mycoplasma genitalium* in Lagos, Nigeria

|                           | <b>Anorectal</b><br><i>Mycoplasma genitalium</i><br>n=181 (%) | <b>Urogenital</b><br><i>Mycoplasma genitalium</i><br>n=61 (%) |
|---------------------------|---------------------------------------------------------------|---------------------------------------------------------------|
| <b>Any Symptom</b>        | 28 (15.5)                                                     | 11 (18.0)                                                     |
| Rash                      | 9 (5.0)                                                       | 4 (6.6)                                                       |
| Fever/sweats              | 8 (4.4)                                                       | 2 (3.3)                                                       |
| Genital ulcer             | 5 (2.8)                                                       | 4 (6.6)                                                       |
| Tumor/growth              | 5 (2.8)                                                       | 2 (3.3)                                                       |
| Pain around the anus      | 4 (2.2)                                                       | 4 (6.6)                                                       |
| Painful urination         | 4 (2.2)                                                       | 1 (1.6)                                                       |
| Anal discharge            | 3 (1.7)                                                       | 2 (3.3)                                                       |
| Penile discharge          | 3 (1.7)                                                       | 1 (1.6)                                                       |
| Genital/rectal pain/sores | 2 (1.1)                                                       | 2 (3.3)                                                       |
| Irritation                | 2 (1.1)                                                       | 1 (1.6)                                                       |
| Abdominal pain            | 1 (0.6)                                                       | 0 (0)                                                         |
| Nausea/vomiting           | 1 (0.6)                                                       | 0 (0)                                                         |

As part of the physical examination and history-taking performed at every study visit, participants were asked about each of the listed symptoms. Among participants diagnosed with *Mycoplasma genitalium* at each anatomic site, the number reporting each solicited symptom was tallied and divided by the total number of cases.
